# Supplementary material for: A targeted boost-and-sort immunization strategy using Escherichia coli BamA identifies rare growth inhibitory antibodies
Source: PubMed Central journal article supplement (PMC5940829; doi:10.1038/s41598-018-25609-z), 2018-05-08
Supplement: 41598_2018_25609_MOESM1_ESM.pdf [file 41598_2018_25609_MOESM1_ESM.pdf]

## **Title**

A targeted boost-and-sort immunization strategy using *Escherichia coli* BamA identifies rare growth inhibitory antibodies

## **Authors**

Rajesh Vij<sup>1</sup>, Zhonghua Lin<sup>1</sup>, Nancy Chiang<sup>1</sup>, Jean-Michel Vernes<sup>4</sup>, Kelly M. Storek<sup>2</sup>, Summer Park<sup>5</sup>, Joyce Chan<sup>4</sup>, Gloria Meng<sup>4</sup>, Laetitia Comps-Agrar<sup>4</sup>, Peng Luan<sup>1</sup>, Sophia Lee<sup>1</sup>, Kellen Schneider<sup>1</sup>, Jack Bevers III<sup>1</sup>, Inna Zilberleyb<sup>3</sup>, Christine Tam<sup>3</sup>, Christopher M. Koth<sup>3</sup>, Min Xu<sup>5</sup>, Avinash Gill<sup>1</sup>, Marcy R. Auerbach<sup>2</sup>, Peter A. Smith<sup>2</sup>, Steven T. Rutherford<sup>2</sup>, Gerald Nakamura<sup>1</sup>, Dhaya Seshasayee<sup>1</sup>, Jian Payandeh<sup>3\*</sup>, James T. Koerber<sup>1\*</sup>

<sup>1</sup>Department of Antibody Engineering, Genentech, 1 DNA Way, South San Francisco, California 94080, USA

<sup>2</sup>Department of Infectious Diseases, Genentech, 1 DNA Way, South San Francisco, California 94080, USA

<sup>3</sup>Department of Structural Biology, Genentech, 1 DNA Way, South San Francisco, California 94080, USA

<sup>4</sup>Department of Biochemical and Cellular Pharmacology, Genentech, 1 DNA Way, South San Francisco, California 94080, USA

<sup>5</sup>Department of Translational Immunology, Genentech, 1 DNA Way, South San Francisco, California 94080, USA

\*Correspondence to J.P. ([payandeh.jian@gene.com](mailto:payandeh.jian@gene.com), 650-225-6416) and J.T.K. ([koerber.james@gene.com](mailto:koerber.james@gene.com), 650-467-4865)

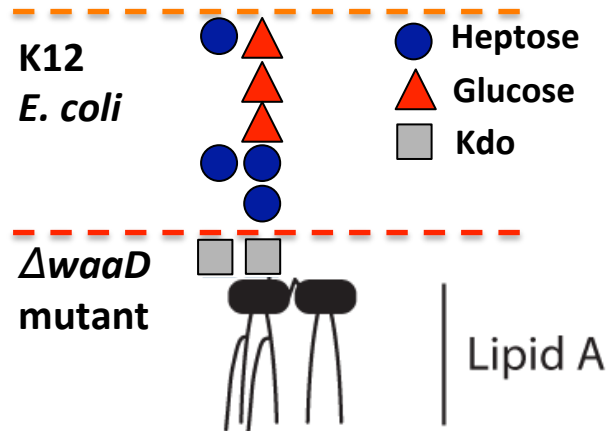

**Supplemental Figure 1. Schematic of LPS structures on *waaD* and K12 strains.** Diagram of LPS structure for both the K12 and *waaD* strains highlighting lack of elongated LPS in *waaD* (blue circle: heptose sugar; red triangle: glucose sugar; grey square: Kdo sugar).

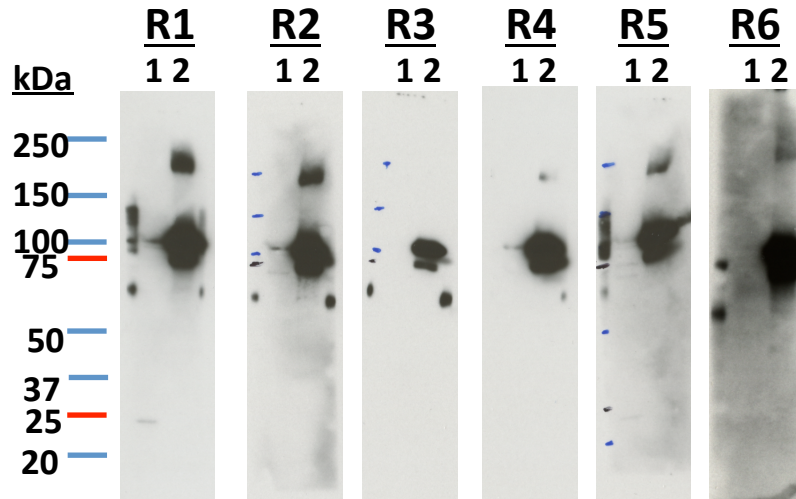

**Supplemental Figure 2. Western blots against purified BamA with pAbs from K12 immunizations.** Western blot results with 10 ug/mL of purified pAbs from bleed 1 are shown. Lane 1 contains 100 ng of an irrelevant protein and lane 2 contains 100 ng of recombinant BamA. All samples were run on a single gel and transferred to a blot. The blot was divided into five parts and each parts was stained with a different purified pAb sample. Images for the full blot are shown.

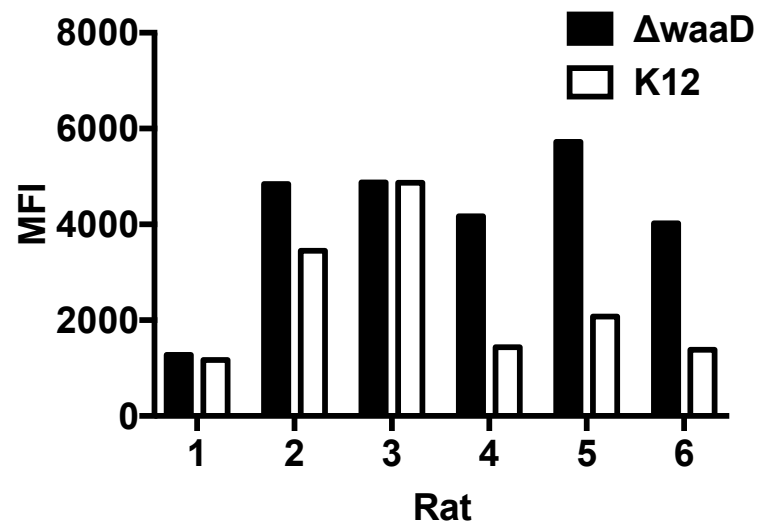

**Supplementary Figure 3. MFI values for purified pAbs from whole cell immunization.** MFI values on either  $\Delta waaD$  (black box) or K12 (white box) with 40 ug/mL purified pAbs for each of the six rats.

| <b>Format</b>                | <b>Advantage</b>                                                                                    | <b>Disadvantage</b>                                                                                           |
|------------------------------|-----------------------------------------------------------------------------------------------------|---------------------------------------------------------------------------------------------------------------|
| Purified protein (detergent) | High purity                                                                                         | <ul style="list-style-type: none"> <li>• Detergent-specific conformation</li> <li>• Production</li> </ul>     |
| Purified protein (matrix)    | <ul style="list-style-type: none"> <li>• High purity</li> <li>• Modular choice of lipids</li> </ul> | <ul style="list-style-type: none"> <li>• Lipid-specific conformation</li> <li>• Production</li> </ul>         |
| Peptide                      | Ease of production                                                                                  | Hard to mimic native conformation                                                                             |
| Membrane fraction            | <ul style="list-style-type: none"> <li>• Ease of production</li> <li>• Native format</li> </ul>     | High level of non-target Abs                                                                                  |
| Membrane vesicle             | <ul style="list-style-type: none"> <li>• Ease of production</li> <li>• Native format</li> </ul>     | <ul style="list-style-type: none"> <li>• High level of non-target Abs</li> <li>• Low target amount</li> </ul> |
| Whole cell                   | <ul style="list-style-type: none"> <li>• Ease of production</li> <li>• Native format</li> </ul>     | <ul style="list-style-type: none"> <li>• High level of non-target Abs</li> <li>• Low target amount</li> </ul> |
| DNA                          | <ul style="list-style-type: none"> <li>• Ease of production</li> <li>• Native format</li> </ul>     | <ul style="list-style-type: none"> <li>• Low immune response</li> <li>• Low expression level</li> </ul>       |

**Supplementary Table 1. Comparison of different antigen formats for membrane proteins.** Overview of advantages and disadvantages in using different antigen formats for antibody discovery.
